# Supplementary material for: Tetrakis(ethyl-4(4-butyryl)oxyphenyl)porphyrinato zinc complexes with 4,4′-bpyridin: synthesis, characterization, and its catalytic degradation of Calmagite
Source: PubMed Central journal article supplement — RSC Adv. 2018 Jun 1;8(36):20143–56. doi: 10.1039/c8ra01134f (PMC9080734; doi:10.1039/c8ra01134f), 2018-06-01
Supplement: RA-008-C8RA01134F-s001.pdf [file RA-008-C8RA01134F-s001.pdf]

## **Tetrakis((ethyl-4(4-butyryl)oxyphenyl)porphyrinato Zinc Complexes with 4,4'-bipyridin: Synthesis, Characterization, and its catalytic degradation of Calmagite**

Raoudha Soury,<sup>1,3</sup> Mahjoub Jabli<sup>2</sup>, Tawfik A Saleh <sup>4\*</sup>, Wathiq Sattar Abdul-Hassan,<sup>3</sup> Eric Saint-Aman,<sup>3</sup> Frédérique Loiseau,<sup>3</sup> Christian Philouze,<sup>5</sup> and Habib Nasri<sup>1</sup>

<sup>1</sup> Laboratory of Physico-Chemical of Materials, Faculty of Sciences of Monastir, 5000 Monastir, University of Monastir, Tunisia.

<sup>2</sup> Textile Materials and Process Research Unit, ENIM, 5000 Monastir, University of Monastir.

<sup>3</sup> Department of Molecular Chemical, UMR CNRS 5250, ICMG-FR 2607, Laboratory of Inorganic Chemistry Rédox, 301 Rue de la Chimie, BP 53-38041 Grenoble Cedex 9, University J. Fourier, France.

<sup>4</sup> Chemistry Department, King Fahd University of Petroleum & Minerals, Dhahran 31261, Saudi Arabia

<sup>5</sup> Department of Molecular Chemicals (CNRS/UGA) Bâtiment chimie recherche, 301 rue de la chimie, domaine universitaire, Saint-Martin-d'Herès, Gieres, CS 40700, 38058 Grenoble CEDEX 9, France.

*\*Corresponding author*

E-mail address: tawfik@kfupm.edu.sa ; tawfikas@hotmail.com

### **Supporting information**

| Tables of contents                         | Pages     |
|--------------------------------------------|-----------|
| 1. X-ray .                                 | page 1-3. |
| 2. <sup>1</sup> H NMR Spectra of compounds | page 3-5  |
| 3. Electrochemistry                        | page 6    |

## 1. X-Ray

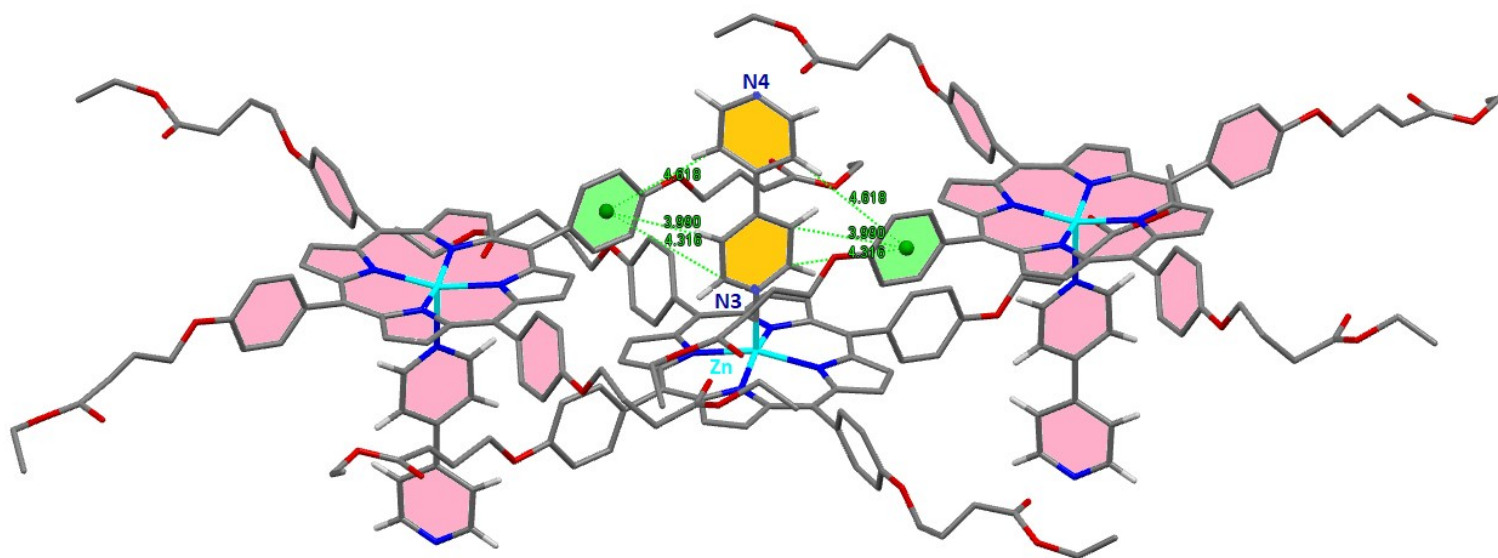

**Figure S1.** Schematic representation of the interactions involving the 4,4'-bipyridine axial ligand of complex **3**.

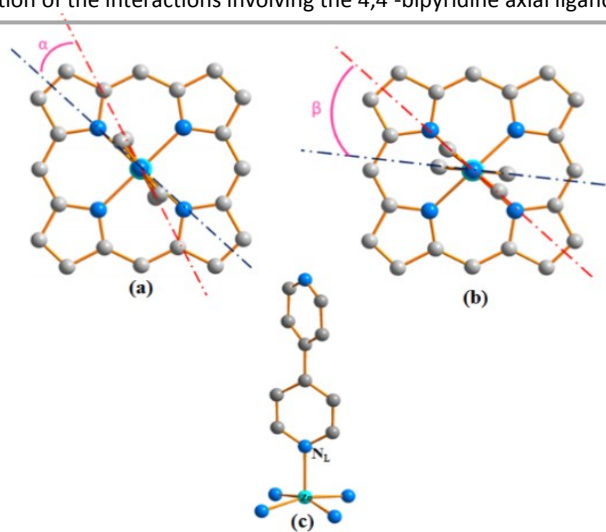

**Figure S2.** Drawings showing (a) : the  $\alpha$  dihedral angle between the “N<sub>p</sub>-M-N<sub>L</sub>” plan (N<sub>p</sub> is the closed pyrrole nitrogen atom) and the first pyridyl moiety of the 4,4'-bipyridine axial ligand, (b) : the  $\beta$  dihedral angle between the two pyridyl rings of the 4,4'-bipyridine and (c) : the coordination geometry of the Zn<sup>2+</sup> cation in complex **3**.

**Table S1.** Crystal and refinement data of [Zn(TEBOP)(4,4'-bpy)] (3).

| Parameters                                                  | Complex 3                                                         |
|-------------------------------------------------------------|-------------------------------------------------------------------|
| Empirical formula                                           | C <sub>78</sub> H <sub>76</sub> N <sub>6</sub> O <sub>12</sub> Zn |
| Formula weight                                              | 1354.87                                                           |
| Cryst. Sym                                                  | Monoclinic                                                        |
| Space group                                                 | C 2/c                                                             |
| a(Å)                                                        | 25.890(5)                                                         |
| b(Å)                                                        | 18.024(5)                                                         |
| c(Å)                                                        | 18.699(5)                                                         |
| β (°)                                                       | 127.821(5)                                                        |
| V (Å <sup>3</sup> )                                         | 6893(3)                                                           |
| Z                                                           | 4                                                                 |
| D <sub>calc</sub> , (g/cm <sup>3</sup> )                    | 1.306                                                             |
| μ (mm <sup>-1</sup> )                                       | 0.424                                                             |
| Max./min. trans.                                            | 1.000/0.624                                                       |
| F(000)                                                      | 2848                                                              |
| Crystal size (mm <sup>3</sup> )                             | 0.49 x 0.41x 0.27                                                 |
| T (K)                                                       | 200(2)                                                            |
| θ range (°)                                                 | 2.55-26.37                                                        |
| Limiting indices                                            | -32 ≤ h ≤ 29, -21 ≤ k ≤ 22,<br>-23 ≤ l ≤ 23                       |
| Reflec. collec/unique                                       | 46070/7020                                                        |
| Parameters                                                  | 570                                                               |
| S [Goodness of fit]                                         | 1.119                                                             |
| R <sub>1</sub> <sup>a</sup> , wR <sub>2</sub> [Fo > 4σ(Fo)] | R <sub>1</sub> = 0.0798, wR <sub>2</sub> = 0.2129                 |
| R <sub>1</sub> , wR <sub>2</sub> <sup>b</sup> [all data]    | R <sub>1</sub> = 0.1130, wR <sub>2</sub> = 0.2634                 |
| Min./max. res. (eÅ <sup>-3</sup> )                          | 0.956 and -0.875                                                  |
| CCDC                                                        | 1060414                                                           |

$$a. R_1 = \frac{\sum ||F_o| - |F_c||}{\sum |F_o|}; b. wR_2 = \left[ \frac{\sum w(F_o^2 - F_c^2)^2}{\sum w(F_o^2)} \right]^{1/2}.$$

**Table S2.** Selected bond distances (Å) and angles (°) in the molecular structure s of [Zn(TEBOP)(4,4'-bpy)] (3).

| Complex 3                           |            |
|-------------------------------------|------------|
| <b>Zinc coordination polyhedron</b> |            |
| Zn–N1                               | 2.057 (3)  |
| Zn–N2                               | 2.078 (3)  |
| Zn–N3                               | 2.152 (5)  |
| N1–Zn–N2                            | 88.62 (14) |
| N1–Zn–N3                            | 97.69 (10) |
| N2–Zn–N3                            | 99.73 (11) |
| <b>4,4'-bipyridine ligand</b>       |            |
| N3–C38                              | 1.324 (6)  |
| C38–C39                             | 1.387 (7)  |
| C39–C40                             | 1.377 (7)  |
| C40–C41                             | 1.517 (11) |
| C41–C42                             | 1.394 (10) |
| C42–C43                             | 1.382 (11) |
| N4–C43                              | 1.344 (12) |

**Table S3.** Selected bond lengths (Å) and angles (°) for **3**, and some 4,4'-bipyridine porphyrinic and non-porphyrinic complexes.

| Complexes                                                                                                | M–N <sub>p</sub> <sup>a</sup> | Zn–N <sub>L</sub> <sup>b</sup> | α (°)       | β (°)    | Ref.         |
|----------------------------------------------------------------------------------------------------------|-------------------------------|--------------------------------|-------------|----------|--------------|
| <b>Zn-(4,4'-bpy) porphyrin complexes</b>                                                                 |                               |                                |             |          |              |
| [Zn(TEBOP)(4,4'-bpy)] ( <b>3</b> )                                                                       | 2.0675(3)                     | 2.151(2)                       | 37          | 36       | Current work |
| [Zn(TOHP) <sub>2</sub> (4,4'-bpy)] <sup>c</sup>                                                          | 2.041<br>2.030                | 2.134<br>2.144                 | 3           | 1        | [1]          |
| [Zn(TPP) <sub>3</sub> (4,4'-bpy) <sub>2</sub> ]                                                          | 2.049(8)                      | 2.185(8)                       | 23          | 24       | [2]          |
| [Zn(TPP) <sub>2</sub> (4,4'-bpy)]                                                                        | 2.055<br>2.065<br>2.081       | 2.490<br>2.169(6)<br>2.270(7)  | 4<br>5<br>7 | 38<br>46 | [2]          |
| <b>M-(4,4'-bpy) porphyrin complexes (M = Co, Fe)</b>                                                     |                               |                                |             |          |              |
| [Co(TPP)(4,4'-bpy)]                                                                                      | 1.993                         | 2.342                          | 12          | 38       | [3]          |
| {[Co(TpivPP)(4,4'-bpy) <sub>2</sub> ]} <sub>n</sub> <sup>d</sup>                                         | 1.984 <sup>e</sup>            | 2.312 <sup>e,f</sup>           | 19          | 38       | [3]          |
|                                                                                                          | 1.976 <sup>e</sup>            | 2.311 <sup>e,f</sup>           | 23          | 35       |              |
| [Fe(TPP)(bpy)]                                                                                           | 1.990                         | 1.985                          | 33          | 30       | [4]          |
| <b>Zn-(4,4'-bpy) non-porphyrin complexes</b>                                                             |                               |                                |             |          |              |
| [Zn(4,4'-bpy) <sub>2</sub> (H <sub>2</sub> O) <sub>4</sub> ](ClO <sub>4</sub> ) <sub>2</sub> ·(4,4'-bpy) | -                             | 2.117(2)                       | -           | 2        | [5]          |
| {[Zn(μ <sub>2</sub> -4,4'-bpy)(μ <sub>4</sub> -BPTC)] <sub>n</sub> } <sup>g</sup>                        | -                             | 2.044                          | -           | 0        | [6]          |
| {[Zn(μ <sub>2</sub> -4,4'-bpy) <sub>2</sub> (μ-FA)] <sub>n</sub> } <sup>h</sup>                          | -                             | 2.114 <sup>i</sup>             | -           | 48       | [7]          |

<sup>a</sup>: Average equatorial zinc–nitrogen pyrrole distance.<sup>b</sup>: N-coordinated zinc atom of the axial ligand L<sup>c</sup>: TOHPP = 5,10,15,20-tetrakis(4-hydroxyphenyl)porphyrinato.<sup>d</sup>: TpivPP = *meso*-4,4'-tetrapivalamidophenylporphyrinato.<sup>e</sup>: The asymmetric unit contains two [Co(TpivPP)(4,4'-bpy)<sub>2</sub>] molecules.<sup>f</sup>: Average values of the two Co–N(bpy) distances.<sup>g</sup>: BPTC = biphenyl-3,3',5,5'-tetracarboxylato.<sup>h</sup>: FA = format-O (CH<sub>2</sub>O<sub>2</sub>).<sup>i</sup>: Average values of the two Zn–N(bpy) distances.**Table S4.** Selected hydrogen bonds and intermolecular C–H...Cg π interactions of complex [Zn(TEBOP)(4,4'-bpy)] (**3**)

| D <sup>a</sup> –H...A <sup>b</sup> | Symmetry of A         | D...A (Å) | D–H...A (°) |
|------------------------------------|-----------------------|-----------|-------------|
| C19–H19B...O1                      | x, y, z               | 2.825(11) | 106         |
| C21–H21b...O2                      | x, y, z               | 2.57(2)   | 103         |
| C33A–H33B...O5A                    | x, y, z               | 2.85(5)   | 104         |
| C37A–H37C...O5A                    | x, y, z               | 2.95(5)   | 113         |
| C37A–H37C...O2                     | –x, y, –z+1/2         | 3.40(4)   | 139         |
| C43–H43...O5A                      | –x+1/2, y+1/2, –z+3/2 | 3.37(3)   | 140         |
| C15–H15...Cg1                      | x+3/2, y+1/2, z+1     | 3.503(5)  | 138         |
| C18–H18A...Cg9                     | x+3/2, y+1/2, z+1     | 3.80(11)  | 170         |
| C18–H18B...Cg2                     | –x+1/2, y+1/2, –z–1/  | 3.773(9)  | 138         |
| C32A–H32A...Cg7                    | –x+1/2, –y+1/2, –z+1  | 3.543(11) | 135         |
| C32A–H32A...Cg7                    | x–1/2, –y+1/2, z–3/2  | 3.543(11) | 135         |
| C25B–H25B...Cg2                    | –x+1/2, –y+1/2, –z+1  | 3.34(2)   | 145         |
| C37B–H37D...Cg9                    | –x, y, –z+1/2         | 3.82(3)   | 143         |

atom.

<sup>b</sup>: A = acceptor atom.Complex **3**: Cg1, Cg2, Cg7 and Cg9 are the centroids of the N1–C1/C4, N2–C6/C9, N3–C38–C39–C40–C38A–C39A–C40A, C11/C16 rings respectively.<sup>a</sup>: D = donor

## 2. $^1\text{H}$ NMR

### 2.1. $^1\text{H}$ NMR Spectra of ethyl-4-(4-butyryl)oxyphenylaldehyde

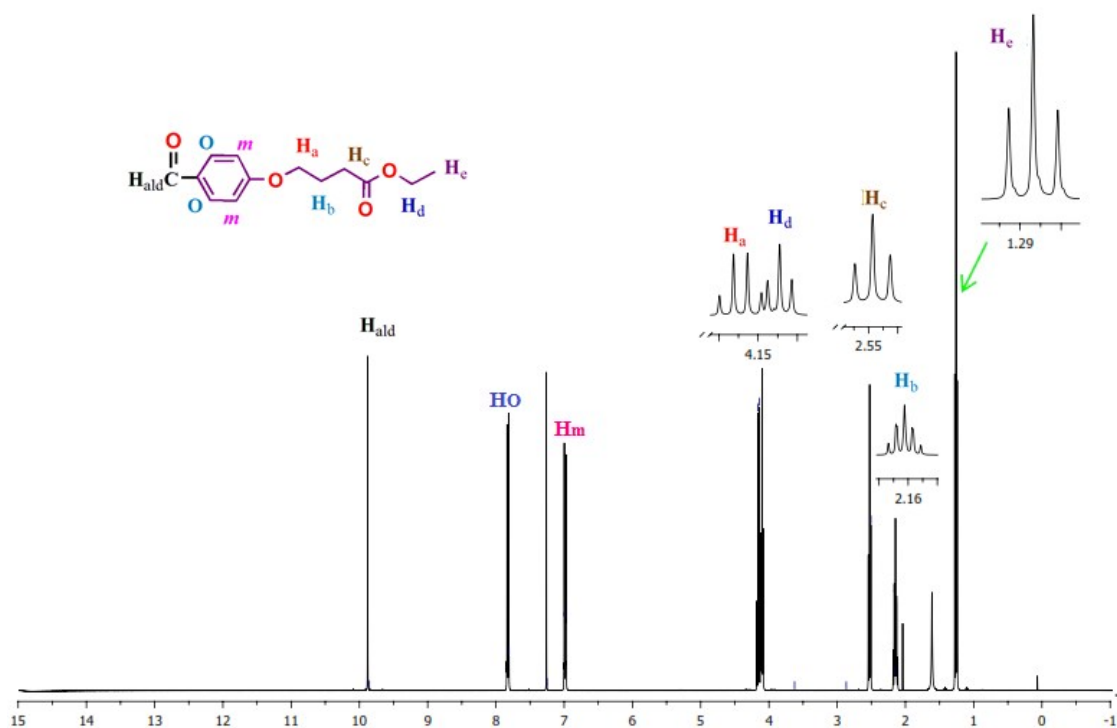

Figure S3.  $^1\text{H}$  NMR spectrum of ethyl-4-(4-butyryl)oxyphenylaldehyde in  $\text{CDCl}_3$ .

### 2.1. $^1\text{H}$ NMR Spectra of compound (3)

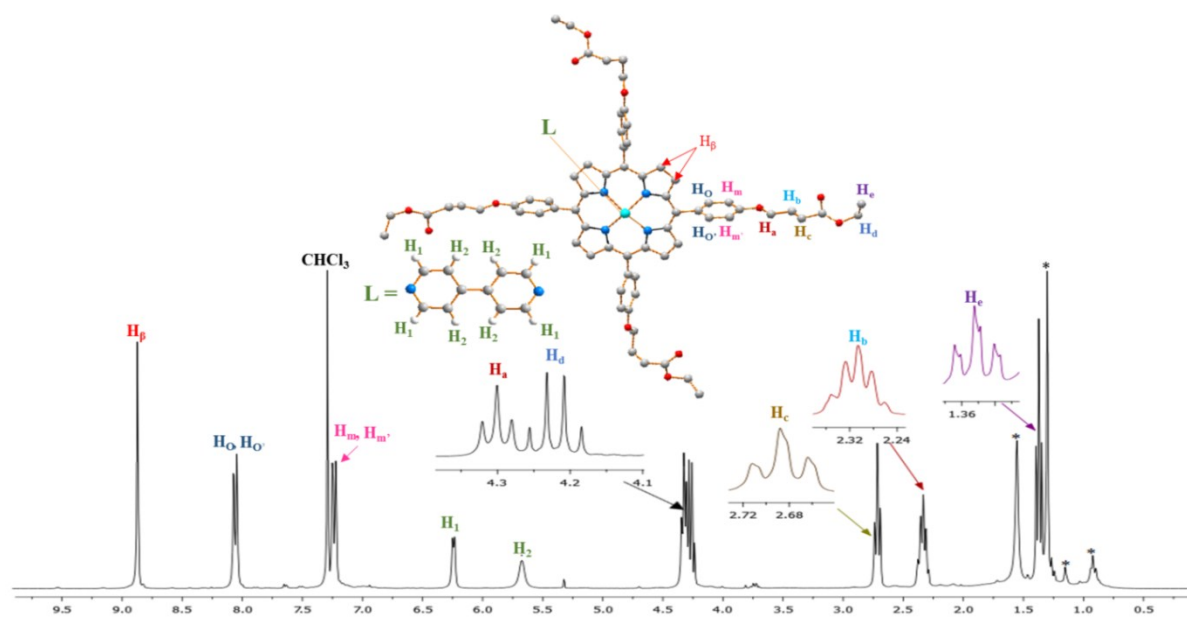

Figure S4.  $^1\text{H}$  NMR spectrum of complex 3 in  $\text{CDCl}_3$ .

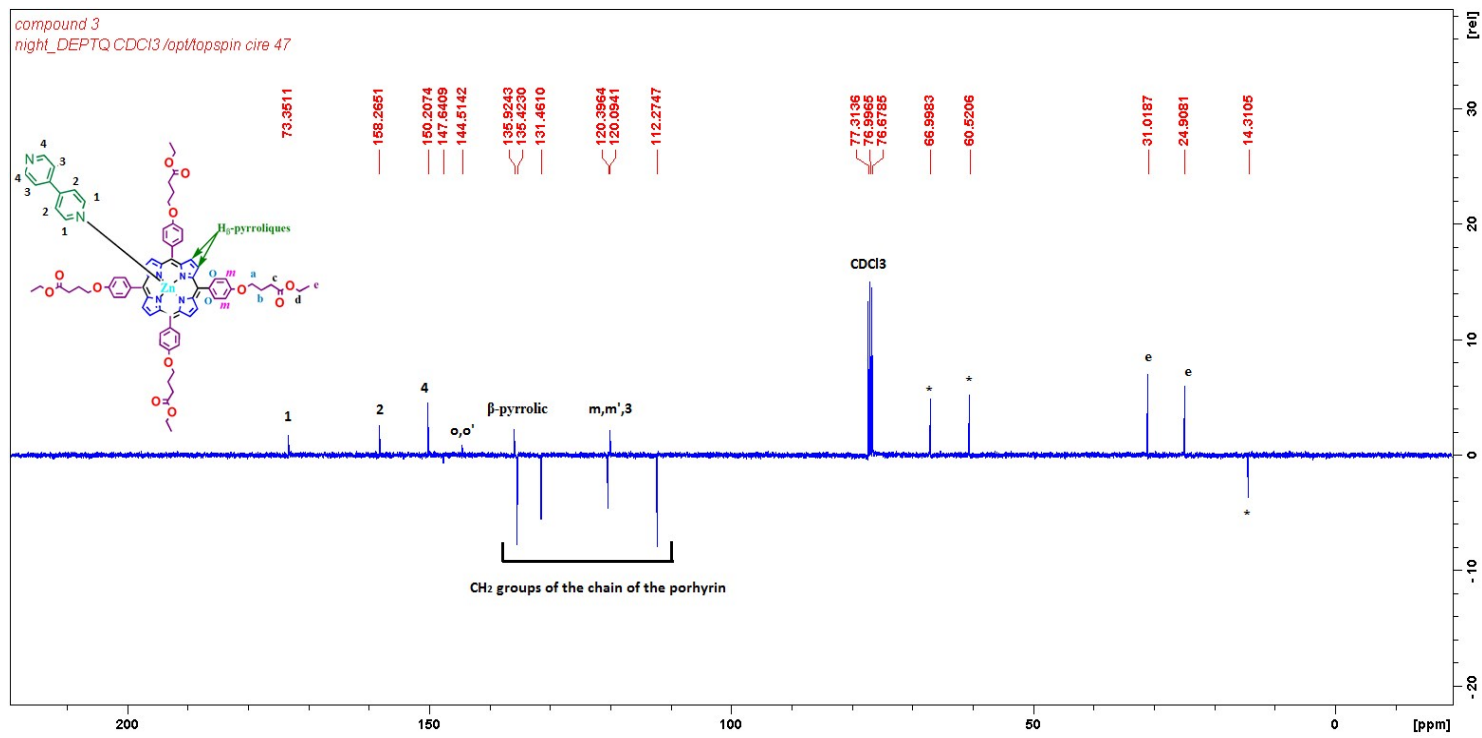

Figure S5.  $^{13}\text{C}$  DEPT spectrum of complex 3 in  $\text{CDCl}_3$

**Table S5.** Electrochemical data for complex 3 and a selection of related zinc metalloporphyrins in dichloromethane (exceptions are indicated).

|                                 | Ring oxidations                    |                              |                               |                                    |                 |                  |                                    |                 |                  | Ring reductions           |                 |                           |                 | Ref |                 |                  |
|---------------------------------|------------------------------------|------------------------------|-------------------------------|------------------------------------|-----------------|------------------|------------------------------------|-----------------|------------------|---------------------------|-----------------|---------------------------|-----------------|-----|-----------------|------------------|
|                                 | 1 <sup>st</sup> oxidation (O1, R1) |                              |                               | 2 <sup>nd</sup> oxidation (O2, R2) |                 |                  | 3 <sup>th</sup> oxidation (O3, R3) |                 |                  | 1 <sup>st</sup> reduction |                 | 2 <sup>nd</sup> reduction |                 |     |                 |                  |
|                                 | E <sub>pa</sub> <sup>b</sup>       | E <sub>pc</sub> <sup>c</sup> | E <sub>1/2</sub> <sup>d</sup> | E <sub>pa</sub>                    | E <sub>pc</sub> | E <sub>1/2</sub> | E <sub>pa</sub>                    | E <sub>pa</sub> | E <sub>1/2</sub> | E <sub>pc</sub>           | E <sub>pa</sub> | E <sub>1/2</sub>          | E <sub>pc</sub> |     | E <sub>pa</sub> | E <sub>1/2</sub> |
| H <sub>2</sub> TPP              | -                                  | -                            | 1.02                          | -                                  | -               | 1.26             | -                                  | -               | -                | -                         | -               | -1.20                     | -               | -   | -1.55           | [8]              |
| H <sub>2</sub> TPP              | -                                  | -                            | 1.08                          | -                                  | -               | 1.35             | -                                  | -               | -                | -                         | -               | -1.21                     | -               | -   | -               | [9]              |
| H <sub>2</sub> TTP <sup>e</sup> | -                                  | -                            | 0.62                          | -                                  | -               | -                | -                                  | -               | -                | -                         | -               | -1.12                     | -               | -   | -1.54           | [10]             |
| H <sub>2</sub> TEBOP (1)        | -                                  | -                            | 0.96                          | -                                  | -               | 1.13             | -                                  | -               | -                | -                         | -               | -1.26                     | -               | -   | -1.60           | this work        |
| [Zn(TPP)]                       | -                                  | -                            | 0.84*                         | -                                  | -               | 1.13*            | -                                  | -               | -                | -                         | -               | -1.31*                    | -               | -   | -1.75 *         | [11]             |
| [Zn(TEBOP)] (2)                 | -                                  | -                            | 0.64                          | -                                  | -               | 0.94             | -                                  | -               | -                | -                         | -               | -1.42                     | -               | -   | -               | this work        |
| [Zn(TDCPP)]                     | -                                  | -                            | 1.06                          | -                                  | -               | 1.36             | -                                  | -               | -                | -                         | -               | -1.20                     | -               | -   | -1.68 *         | [11]             |
| [Zn(TPFPP)] <sup>f</sup>        | -                                  | -                            | 1.37                          | -                                  | -               | 1.58             | -                                  | -               | -                | -                         | -               | -0.95                     | -               | -   | -1.37           | [11]             |
| [Zn(TEBOP)(4,4'-bpy)] (3)       | 0.68                               | 0.61                         | 0.64                          | 0.98                               | 0.90            | 0.94             | 1.41                               | 1.25            | 1.33             | -1.50                     | -1.42           | -1.46                     | -               | -   | -               | this work        |
| [Zn(TPP)(HIm)]                  | -                                  | -                            | 0.70*                         | -                                  | -               | 1.40*            | -                                  | -               | -                | -                         | -               | -1.40*                    | -               | -   | -1.75 *         | [11]             |
| [Zn(TPP)(2-Meim)]               | -                                  | -                            | 0.71*                         | -                                  | -               | 1.37*            | -                                  | -               | -                | -                         | -               | -1.45*                    | -               | -   | -1.75 *         | [11]             |
| [Zn(TMP)(HIm)]                  | -                                  | -                            | 0.63*                         | -                                  | -               | 1.26*            | -                                  | -               | -                | -                         | -               | -1.55*                    | -               | -   | -               | [11]             |
| [Zn(TPP)(2-Meim)]               | -                                  | -                            | 0.63*                         | -                                  | -               | 1.23*            | -                                  | -               | -                | -                         | -               | -1.60*                    | -               | -   | -               | [11]             |

<sup>a</sup>: The potentials are reported versus SCE.

<sup>b</sup>: E<sub>pa</sub> = anodic peak potential.

<sup>c</sup>: E<sub>pc</sub> = cathodic peak potential.

<sup>d</sup>: E<sub>1/2</sub> = half wave potential.

<sup>e</sup>: in THF.

<sup>f</sup>: TPFPP : is the dianion of the tetrapentafluorophenylporphyrin.

\* : Irreversible wave.

## Notes and references

1. Y. Diskin-Posner, G. K. Patra and I. Goldberg, *Chem, Commun*, 2002, 1420-1421.
2. A. D. Shukla, P. C. Dave, E. Suresh, A. Das and P. Dastidar, *Dalton Tran.s*, 2000, 4459-4463.
3. A. Mansour, Y. Belghith, M. Salah Belkhiria, A. Bujacz, V. Guérineau and H. Nasri, *J. Porphyrins Phthalocyanines*, 2013, **17**, 1094–1103.
4. A. Fidalgo-Marijuan, G. Barandika, B. Bazán, M. K. Urtiaga, L. Lezama, M. I. Arriortua, *Inorg. Chem.*, 2013, **52**, 8074–8081.
5. L. Dolatyari, P. Seddigi, A. Ramazani, M. G. Amiri, and A. Morsali, *J. Struct. Chem.*, 2013, **54**, 571-576.
6. Q. Li and J. Qian, *RSC Advances*, 2014, **14**, 32391-32397.
7. X.-H. Miao, H.-P. Xiao and L.-G. Zhu, *Acta, Crystallogr, Sect. E.*, 2006, **62**, m1756-m1757.
8. K. M. Kadish and M. M. Morrison, *J. Am. Chem. Soc.*, 1976, **98**, 3326-3328.
9. A. Giraudeau, H. J. Callot and M. Gross, *Inorg. Chem.*, 1979, **18**, 201-206.
10. K. M. Kadish, J. D. Dubois, J.-M. Barbe, and R. Guillard, *Inorg. Chem.*, 1991, **30**, 4498-4501.
11. C.-I. Lin, M.-Y. Fang and S.-H. Cheng, *J. Electroanal. Chem.*, 2002, **531**, 155-162.
